# Supplementary figures and images for: DUOX2-derived reactive oxygen species are effectors of NOD2-mediated antibacterial responses
Source: Oxford University Press journal article supplement (doi:10.1242/jcs.050690), 2009-09-16

72 hours

siRNA

*DUOX2*

*GAPDH*

|  |                                                                                   | DUOX2                                                                             |                                                                                   |                                                                                   |
|--|-----------------------------------------------------------------------------------|-----------------------------------------------------------------------------------|-----------------------------------------------------------------------------------|-----------------------------------------------------------------------------------|
|  | ctr.                                                                              | #1                                                                                | #2                                                                                | #3                                                                                |
|  |  |  |  |  |
|  |  |  |  |  |

Supplement: jcs050690figs1.pdf [file jcs050690figs1.pdf]
